# Supplementary material
Source: Springer Nature journal article supplement (http://www.springermedizin.de/resource/supplementary/12913_2010_1649_MOESM1_ESM.pdf/9528644)

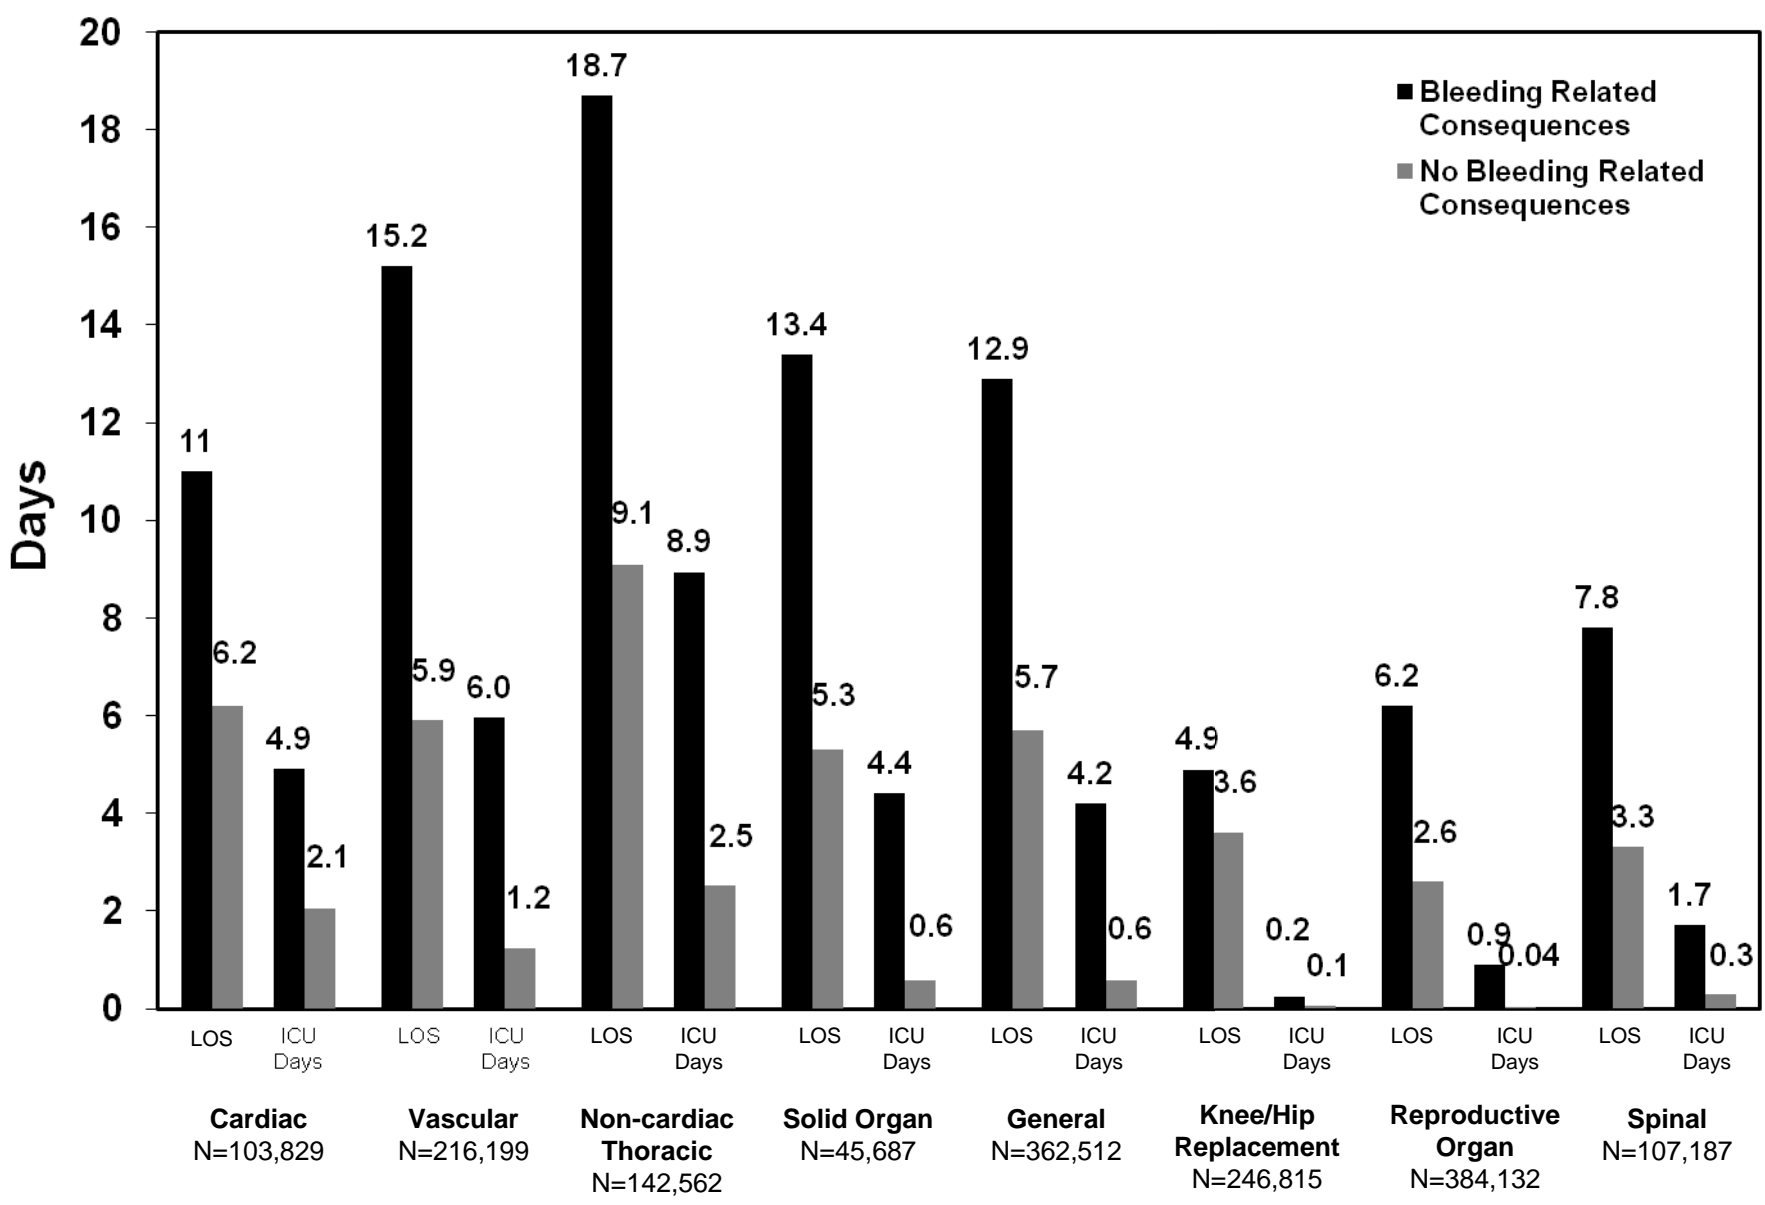

Supplement: MOESM1 [file 9528644]
